# Supplementary material for: Essential Role of CRIM1 on Endometrial Receptivity in Goat
Source: MDPI journal article supplement (doi:10.3390/ijms22105323), 2021-05-18
Supplement: s1 [file s1]

Supplementary Table. S1.

Short hairpin interfering RNA (shRNA) inserts.

| shRNA     | Sequence (loop in bold letters) (5' to 3')                                                                                  |
|-----------|-----------------------------------------------------------------------------------------------------------------------------|
| shCRIM1-1 | GATCCGCCCTTCTGTATCCTGTGAAACTCGAGTTTCACAGGATACAGAAGGGCTTTTG<br>AATTCAAAAAGCCCTTCTGTATCCTGTGAAACTCGAGTTTCACAGGATACAGAAGGGCG   |
| shCRIM1-2 | GATCCGGTATCGAACACCAACTAAGCCTCGAGGCTTAGTTGGTGTTTCGATACCTTTTG<br>AATTCAAAAAGGTATCGAACACCAACTAAGCCTCGAGGCTTAGTTGGTGTTTCGATACCG |
| shCRIM1-3 | GATCCGGGAAGATGACTGCACGTTCTCTCGAGAGAACGTGCAGTCATCTTCCCTTTTG<br>AATTCAAAAAGGGAAGATGACTGCACGTTCTCTCGAGAGAACGTGCAGTCATCTTCCCG   |
| shATG7    | GATCCGCTACAAACTTGGCTGCTACTCTCGAGAGTAGCAGCCAAGTTTGTAGCTTTTG<br>AATTCAAAAAGCTACAAACTTGGCTGCTACTCTCGAGAGTAGCAGCCAAGTTTGTAGCG   |
| shN       | GATCCTTCTCCGAACGTGTCACGTTTCAAGAGAACGTGACACGTTCCGGAGAATTTTGTG<br>AATTCAAAAATTCTCCGAACGTGTCACGTTCTCTTGAAACGTGACACGTTCCGGAGAAG |
