# Supplementary material for: Essential Role of CRIM1 on Endometrial Receptivity in Goat
Source: MDPI journal article supplement (doi:10.3390/ijms22105323), 2021-05-18
Supplement: s1 [file s1]

Supplementary Table S2. Primer pairs used for Real time quantitative PCR

| Gene                   | Sequences(5'→3')                                                   | References or GenBank accession number |
|------------------------|--------------------------------------------------------------------|----------------------------------------|
| <i>ITGB3</i>           | Forward: acggtgagcttcagcattga<br>Reverse: acacccacactcaaaggtc      | XM_018047091.1                         |
| <i>ITGB5</i>           | Forward: cccacgagaaggctacttgg<br>Reverse: ttcaacaggcgtctcgalcc     | XM_018047092.1                         |
| <i>SPP1</i>            | Forward: tgagaattgcagtatttc<br>Reverse: tgagatgggtcaggcttag        | XM_005680968.3                         |
| <i>PTGS1</i>           | Forward: tcacagtgcgtccaaccttacc<br>Reverse: acggagggcagaatgcgagta  | XM_005687044.3                         |
| <i>PTGS2</i>           | Forward: gagttaggattcgaccagtat<br>Reverse: ccttgaagtgggttaagtattag | XM_018060731.1                         |
| <i>PTGES</i>           | Forward: catcaaatgtacgcgggtggc<br>Reverse: gtcctcgggttgcaaaagc     | XM_018055956.1                         |
| <i>PGFS</i>            | Forward: tggaggaccagttctttgtg<br>Reverse: tacctgatagcgaagggaac     | XM_004014323.3                         |
| <i>GAPDH</i>           | Forward: gatggtgaagtcggagtgaac<br>Reverse: gtcattgatggcgacgatgt    | XM_005680968.3                         |
| <i>miR-143-5p-loop</i> | gtcgtatccagtgcagggtccgaggtattcgactggatacgacgagcta                  | /                                      |
| <i>miR-143-5p</i>      | Forward: cgcgtgagatgaagcactg<br>Reverse: agtgcagggtccgaggtatt      | /                                      |
| <i>U6</i>              | Forward: ctgccttcggcagcaca<br>Reverse: aacgcttcacgaatttcgt         | /                                      |
